# Supplementary material for: Patient safety competency and educational needs of nursing educators in South Korea
Source: PubMed Central journal article supplement (PMC5584796; doi:10.1371/journal.pone.0183536), 2017-09-05

## 심의결과 통보서

| 수신     | 책임연구자                                                                                                                                                                                                                                                                                                                                                                                                                                                                                                                                                             | 성명 | 장해나 | 소속 | 간호학과 | 직위 | 학생 |
|--------|-------------------------------------------------------------------------------------------------------------------------------------------------------------------------------------------------------------------------------------------------------------------------------------------------------------------------------------------------------------------------------------------------------------------------------------------------------------------------------------------------------------------------------------------------------------------|----|-----|----|------|----|----|
|        | 지원기관                                                                                                                                                                                                                                                                                                                                                                                                                                                                                                                                                              |    |     |    |      |    |    |
| 승인 번호  | IRB No. 2013-113                                                                                                                                                                                                                                                                                                                                                                                                                                                                                                                                                  |    |     |    |      |    |    |
| 연구과제명  | 간호 교육 인력의 환자안전 역량 및 교육 요구도 조사                                                                                                                                                                                                                                                                                                                                                                                                                                                                                                                                     |    |     |    |      |    |    |
| 연구종류   | <input checked="" type="checkbox"/> 설문조사 <input type="checkbox"/> 관찰연구 <input type="checkbox"/> 행동실험연구 <input type="checkbox"/> 조직 및 검체 연구(혈액, 체액 등)<br><input type="checkbox"/> 배아연구 <input type="checkbox"/> 체세포복제 배아연구 <input type="checkbox"/> 유전자연구 <input type="checkbox"/> 유전자치료연구<br><input type="checkbox"/> 보관된 검체 연구 <input type="checkbox"/> 임상시험 <input type="checkbox"/> 기타 ( )                                                                                                                                                                     |    |     |    |      |    |    |
| 심의종류   | <input type="checkbox"/> 정규심의 <input checked="" type="checkbox"/> 신속심의 <input type="checkbox"/> 긴급심의                                                                                                                                                                                                                                                                                                                                                                                                                                                              |    |     |    |      |    |    |
| 심의일자   | 2016년 2월 1일                                                                                                                                                                                                                                                                                                                                                                                                                                                                                                                                                       |    |     |    |      |    |    |
| 심의대상   | <input type="checkbox"/> 연구계획서(신규) <input type="checkbox"/> 책임연구자<br><input type="checkbox"/> 연구계획서(보완) <input type="checkbox"/> 연구참여자 동의서<br><input type="checkbox"/> 계획서 변경 <input type="checkbox"/> 총례기록서<br><input type="checkbox"/> 중간보고서 <input type="checkbox"/> 연구참여자 모집 광고<br><input type="checkbox"/> 중지 또는 조기종료보고서 <input type="checkbox"/> 연구참여자 작성 일지<br><input checked="" type="checkbox"/> 종료보고서 <input type="checkbox"/> 기타 연구참여자에게 제공되는 문서<br><input type="checkbox"/> 승인된 연구계획서의 1년 단위 지속심의 <input checked="" type="checkbox"/> 기타 (최종 연구결과보고서) |    |     |    |      |    |    |
| 심의결과   | 승인                                                                                                                                                                                                                                                                                                                                                                                                                                                                                                                                                                |    |     |    |      |    |    |
| 승인일자   | 년 월 일    승인유효기간    년 월 일 까지                                                                                                                                                                                                                                                                                                                                                                                                                                                                                                                                       |    |     |    |      |    |    |
| 정기보고주기 | <input type="checkbox"/> 3개월 <input type="checkbox"/> 6개월 <input type="checkbox"/> 1년 <input type="checkbox"/> 기타 ( )    ❖ 정기보고주기는 1년을 초과할 수 없음                                                                                                                                                                                                                                                                                                                                                                                                                   |    |     |    |      |    |    |
| 심의의견   | 1. 연구가 전체적으로 초기 및 변경 심의 시 제안된 방법을 사용하여 진행되었기에 연구종료를 승인합니다.<br>2. 만일 연구자께서 동일한 연구과제를 계속해서 진행하실 경우 본 연구의 IRB No. 로는 연구를 계속 진행하실 수 없으며, 다시 초기심의를 신청하셔서 새로운 IRB No.를 부여 받으신 후 연구를 하셔야 함을 유의하여 주시기 바랍니다.                                                                                                                                                                                                                                                                                                                                                               |    |     |    |      |    |    |

2016년 2월 1일

### 서울대학교 생명윤리위원회 위원장

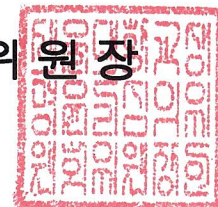

Supplement: pone.0183536.s004.pdf [file pone.0183536.s004.pdf]
