# Supplementary material for: Patient safety competency and educational needs of nursing educators in South Korea
Source: PubMed Central journal article supplement (PMC5584796; doi:10.1371/journal.pone.0183536), 2017-09-05
Supplement: pone.0183536.s002.pdf [file pone.0183536.s002.pdf]

**Definitions of “errors” and “harm” in the survey questions are as follow:**

- **Errors:** The failure of a planned action to be completed as intended or the use of a wrong plan to achieve an aim.
- **Harm:** Unintended harm to the patient by an act of commission or omission rather than by the underlying disease or condition of the patient.

**I . Please indicate your opinion on how much you agree with each of the following questions:**

|                                                                                                                                                                                           | 1                 | 2        | 3                          | 4     | 5              |
|-------------------------------------------------------------------------------------------------------------------------------------------------------------------------------------------|-------------------|----------|----------------------------|-------|----------------|
|                                                                                                                                                                                           | Strongly disagree | Disagree | Neither disagree nor agree | Agree | Strongly agree |
| 1. Making errors in healthcare is preventable.                                                                                                                                            | 1                 | 2        | 3                          | 4     | 5              |
| 2. Healthcare professionals should make an effort to improve patient safety.                                                                                                              | 1                 | 2        | 3                          | 4     | 5              |
| 3. Healthcare professionals should not tolerate uncertainty in patient care.                                                                                                              | 1                 | 2        | 3                          | 4     | 5              |
| 4. Learning how to improve patient safety is an appropriate use of time in health programs in school.                                                                                     | 1                 | 2        | 3                          | 4     | 5              |
| 5. Healthcare professionals routinely share information about medical errors and what caused them.                                                                                        | 1                 | 2        | 3                          | 4     | 5              |
| 6. Patient safety is a high priority to healthcare professionals.                                                                                                                         | 1                 | 2        | 3                          | 4     | 5              |
| 7. Healthcare professionals should routinely report whenever certain errors occur.                                                                                                        | 1                 | 2        | 3                          | 4     | 5              |
| 8. Healthcare professionals should disclose errors to an affected patient and his or her family.                                                                                          | 1                 | 2        | 3                          | 4     | 5              |
| 9. If there is no harm to the patient, there is no need to report an error.                                                                                                               | 1                 | 2        | 3                          | 4     | 5              |
| 10. If I saw an error, I would keep it to myself.                                                                                                                                         | 1                 | 2        | 3                          | 4     | 5              |
| 11. Technology and information management tools (e.g., bar codes, electronic medical record, automatic alerts and alarms) should be used appropriately to support safe processes of care. | 1                 | 2        | 3                          | 4     | 5              |
| 12. Value own role in preventing errors.                                                                                                                                                  | 1                 | 2        | 3                          | 4     | 5              |
| 13. Value nurses' involvement in design, selection, implementation, and evaluation of information technologies to support patient care.                                                   | 1                 | 2        | 3                          | 4     | 5              |
| 14. A standardized procedure minimizes risks associated with handoff(e.g., transfer, shifts) within disciplines and across transitions in care.                                           | 1                 | 2        | 3                          | 4     | 5              |

**II. Please indicate your opinion on how skillful you are at performing each of the following tasks:**

|                                                                                                                                                                                    | <b>1</b>                                    | <b>2</b>                               | <b>3</b>                             | <b>4</b>                                        | <b>5</b>                                             |
|------------------------------------------------------------------------------------------------------------------------------------------------------------------------------------|---------------------------------------------|----------------------------------------|--------------------------------------|-------------------------------------------------|------------------------------------------------------|
|                                                                                                                                                                                    | I am barely capable of performing the tasks | I have difficulty performing the tasks | I am capable of performing the tasks | I am capable of performing the tasks skillfully | I am capable of performing the tasks very skillfully |
| 1. Report errors using an organizational error reporting system.                                                                                                                   | 1                                           | 2                                      | 3                                    | 4                                               | 5                                                    |
| 2. Accurately enter an error report.                                                                                                                                               | 1                                           | 2                                      | 3                                    | 4                                               | 5                                                    |
| 3. Analyze a case to find the causes of an error.                                                                                                                                  | 1                                           | 2                                      | 3                                    | 4                                               | 5                                                    |
| 4. Support and advise a peer who must decide how to respond to an error.                                                                                                           | 1                                           | 2                                      | 3                                    | 4                                               | 5                                                    |
| 5. Disclose an error to a faculty member.                                                                                                                                          | 1                                           | 2                                      | 3                                    | 4                                               | 5                                                    |
| 6. Communicate observations or concerns related to hazards or errors with health care professionals.                                                                               | 1                                           | 2                                      | 3                                    | 4                                               | 5                                                    |
| 7. Communicate observations or concerns related to hazards or errors with an affected patient and his or her family.                                                               | 1                                           | 2                                      | 3                                    | 4                                               | 5                                                    |
| 8. Locate evidence reports related to clinical practice topics and guidelines to define uncertainty in nursing care.                                                               | 1                                           | 2                                      | 3                                    | 4                                               | 5                                                    |
| 9. Use high quality electronic sources of health care information (e.g., online medical database).                                                                                 | 1                                           | 2                                      | 3                                    | 4                                               | 5                                                    |
| 10. Use technology and information management tools (e.g., barcodes, electronic medical record, and automatic alerts and alarms) to support safe processes of care.                | 1                                           | 2                                      | 3                                    | 4                                               | 5                                                    |
| 11. Prevent and manage pressure ulcers.                                                                                                                                            | 1                                           | 2                                      | 3                                    | 4                                               | 5                                                    |
| 12. Practice hand hygiene to prevent infection.                                                                                                                                    | 1                                           | 2                                      | 3                                    | 4                                               | 5                                                    |
| 13. Use falls risk assessment tool to prevent falls.                                                                                                                               | 1                                           | 2                                      | 3                                    | 4                                               | 5                                                    |
| 14. Give a blood transfusion according to transfusion policies for safe care.                                                                                                      | 1                                           | 2                                      | 3                                    | 4                                               | 5                                                    |
| 15. Administer drug to patient according to medication policies for safe care.                                                                                                     | 1                                           | 2                                      | 3                                    | 4                                               | 5                                                    |
| 16. Follow communication practices that minimize risks associated with hand offs between and among providers and across transitions in care.                                       | 1                                           | 2                                      | 3                                    | 4                                               | 5                                                    |
| 17. Document hand-off communication according to institutional policies.                                                                                                           | 1                                           | 2                                      | 3                                    | 4                                               | 5                                                    |
| 18. Use standard infection control precautions for all patient encounters and other transmission precautions as appropriate.                                                       | 1                                           | 2                                      | 3                                    | 4                                               | 5                                                    |
| 19. Use appropriate personal protective equipment (e.g., mask, goggles, gloves).                                                                                                   | 1                                           | 2                                      | 3                                    | 4                                               | 5                                                    |
| 20. Apply aseptic technique when inserting invasive devices as appropriate for patient care procedures (e.g., foley catheter insertion, intravenous catheter insertion, dressing). | 1                                           | 2                                      | 3                                    | 4                                               | 5                                                    |
| 21. Check patient's identity accurately (e.g., a registration number, birth date, name).                                                                                           | 1                                           | 2                                      | 3                                    | 4                                               | 5                                                    |

**III. Please indicate your opinion on how much you are aware of each of the following items:**

|                                                                                                                                                                                                  | 1                 | 2                   | 3          | 4               | 5               |
|--------------------------------------------------------------------------------------------------------------------------------------------------------------------------------------------------|-------------------|---------------------|------------|-----------------|-----------------|
|                                                                                                                                                                                                  | I am hardly aware | I am not well aware | I am aware | I am well aware | I am very aware |
| 1. Describe factors that create a culture of safety (e.g., teamwork, leadership, effective communication).                                                                                       | 1                 | 2                   | 3          | 4               | 5               |
| 2. Describe role of human factors in assuring safety. (e.g., physical, psychological limitations of human, interactions between human and instrument)                                            | 1                 | 2                   | 3          | 4               | 5               |
| 3. Distinguish among errors, adverse events, near misses, and hazards.                                                                                                                           | 1                 | 2                   | 3          | 4               | 5               |
| 4. Describe processes used in analyzing causes of error (e.g., root cause analysis).                                                                                                             | 1                 | 2                   | 3          | 4               | 5               |
| 5. Describe the impact (benefits and limitations) of technology and information management care (e.g., bar codes, electronic medical record, medication pumps, and automatic alerts and alarms). | 1                 | 2                   | 3          | 4               | 5               |
| 6. Explain how authority gradients (horizontal, vertical) influence teamwork and patient safety.                                                                                                 | 1                 | 2                   | 3          | 4               | 5               |
